# Supplementary material for: Mutation of OsPIN1b by CRISPR/Cas9 Reveals a Role for Auxin Transport in Modulating Rice Architecture and Root Gravitropism
Source: MDPI journal article supplement (doi:10.3390/ijms23168965), 2022-08-11
Supplement: s1 [file s1]

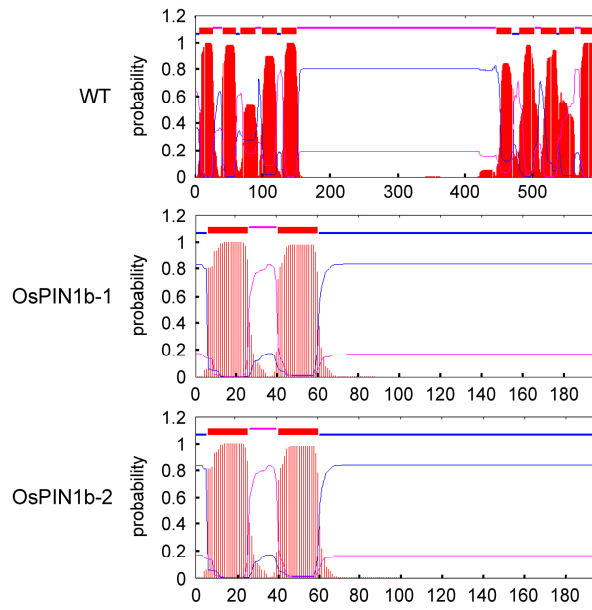

**Figure S1.** Transmembrane helices analysis of OsPIN1b proteins in wild-type (WT) and *ospin1b* mutants. The transmembrane helice analysis was performed by TMHMM-2.0: <https://services.healthtech.dtu.dk/service.php?TMHMM-2.0>, and the red peaks indicate the predicted transmembrane helices of proteins.

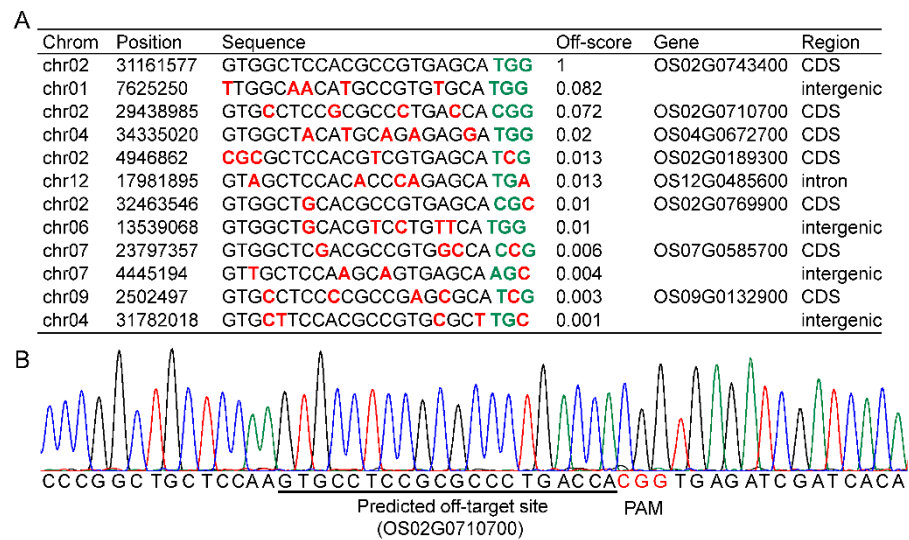

**Figure S2.** Off-target analysis of *ospin1b* mutants. (A) The potential off-target sites predicted by CRISPR-GE. (B) The sequencing chromatogram of the predicted potential off-target site.

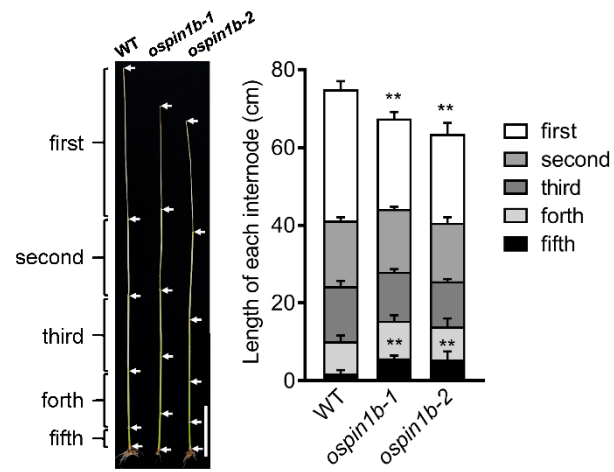

**Figure S3.** Internode length of wild-type (WT) and *ospin1b* mutants at the mature stage. Bar = 10 cm. Values are means  $\pm$  standard deviation (SD) (n = 16). Data were analyzed by ANOVA and Tukey's tests. \*\*:  $p < 0.01$ .

**Table S1.** Primers used in this study.

| <b>Primers for vector construction</b>                | Primer sequences (5'-3')   |
|-------------------------------------------------------|----------------------------|
| OsPIN1b-CRISPR-F                                      | TGTGTGTGGCTCCACGCCGTGAGCA  |
| OsPIN1b-CRISPR-R                                      | AAACTGCTCACGGCGTGGAGCCAC   |
| <b>Primers for screening of the transgenic plants</b> |                            |
| HPT-F                                                 | CTGAACTCACCGCGACGTCTGTC    |
| HPF-R                                                 | TAGCGCGTCTGCTGCTCCATACA    |
| <b>Primers for mutant identification</b>              |                            |
| PIN1b-Assay-F                                         | GTGAAATAGTGCCACCGAGTGAGCGC |
| PIN1b-Assay-R                                         | CCATGAGGCTGCCGGAGAACTCC    |
| <b>Primers for off-target analysis</b>                |                            |
| 700-OT-F                                              | TTCTGCTACTGCGGGGTGAGG      |
| 700-OT-R                                              | TAGGGGAATGGAGGCATGTTC      |
| <b>Primers for qRT-PCR</b>                            |                            |
| OsPIN1b-qF                                            | GAATCGTGCCCTTTGTGTTTG      |
| OsPIN1b-qR                                            | TGTAGTAGACGAGGGTGATAGG     |
| OsACTIN1-qF                                           | CTTCATAGGAATGGAAGCTGCG     |
| OsACTIN1-qR                                           | CACCTTGATCTTCATGCTGCTA     |
